# Supplementary material
Source: PubMed Central journal article supplement (PMC4297258)
Supplement: NIHMS641609-supplement-1a.pdf [file NIHMS641609-supplement-1a.pdf]

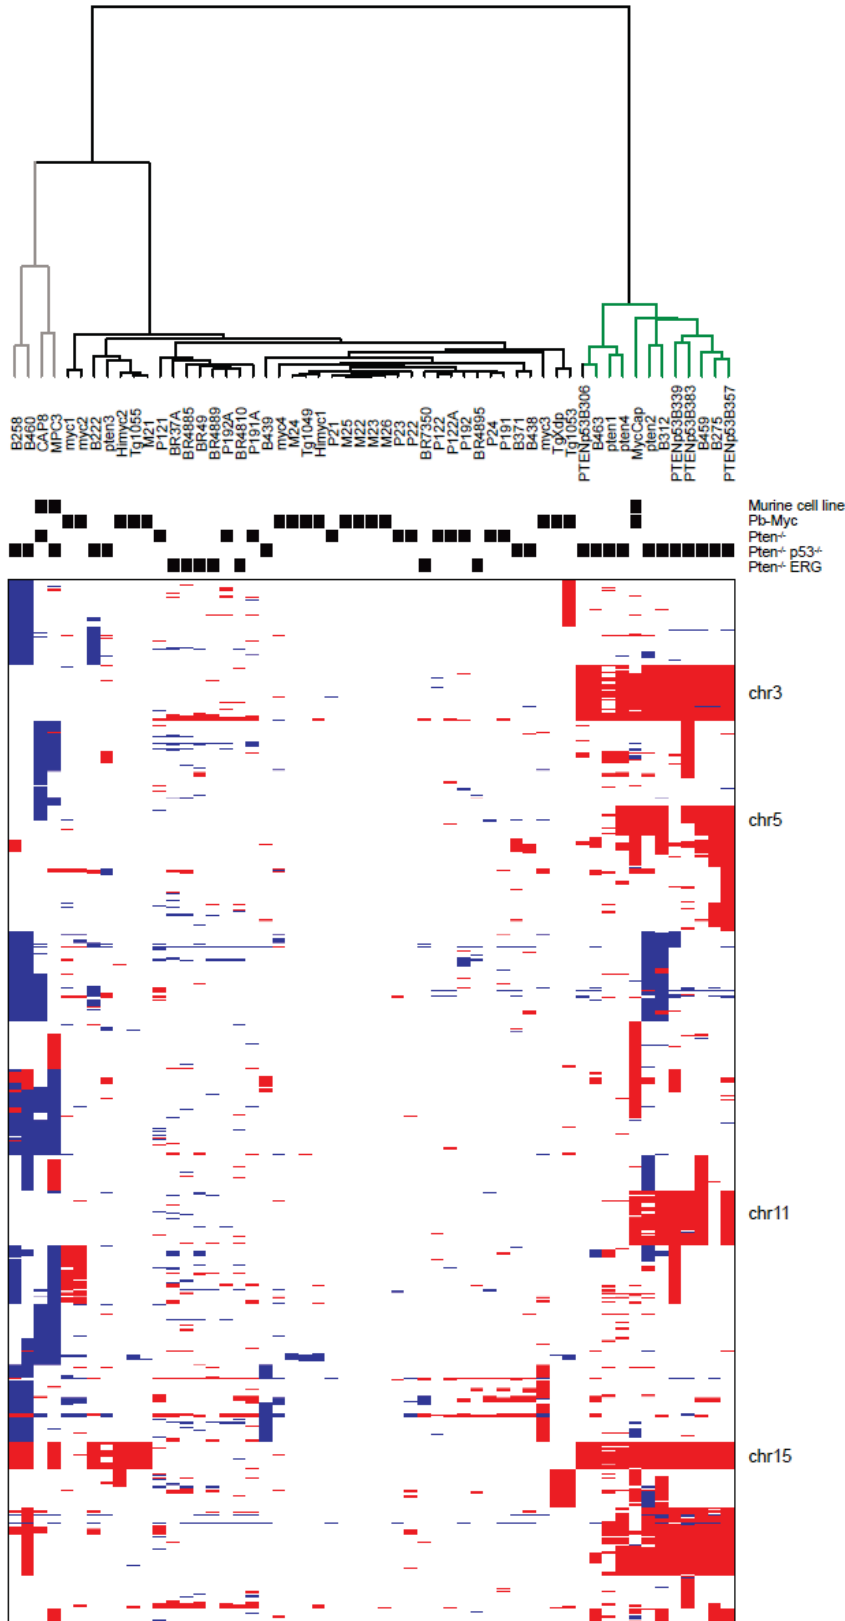

**Figure S1.**  
**Unsupervised**  
**clustering of**  
**Genomic profiles of**  
**GEM models of**  
**prostate cancer.**  
 Unsupervised  
 clustering of aCGH  
 data of GEM models  
 of prostate cancer.  
 Blue color = copy  
 number loss, Red  
 color = copy number  
 gain.

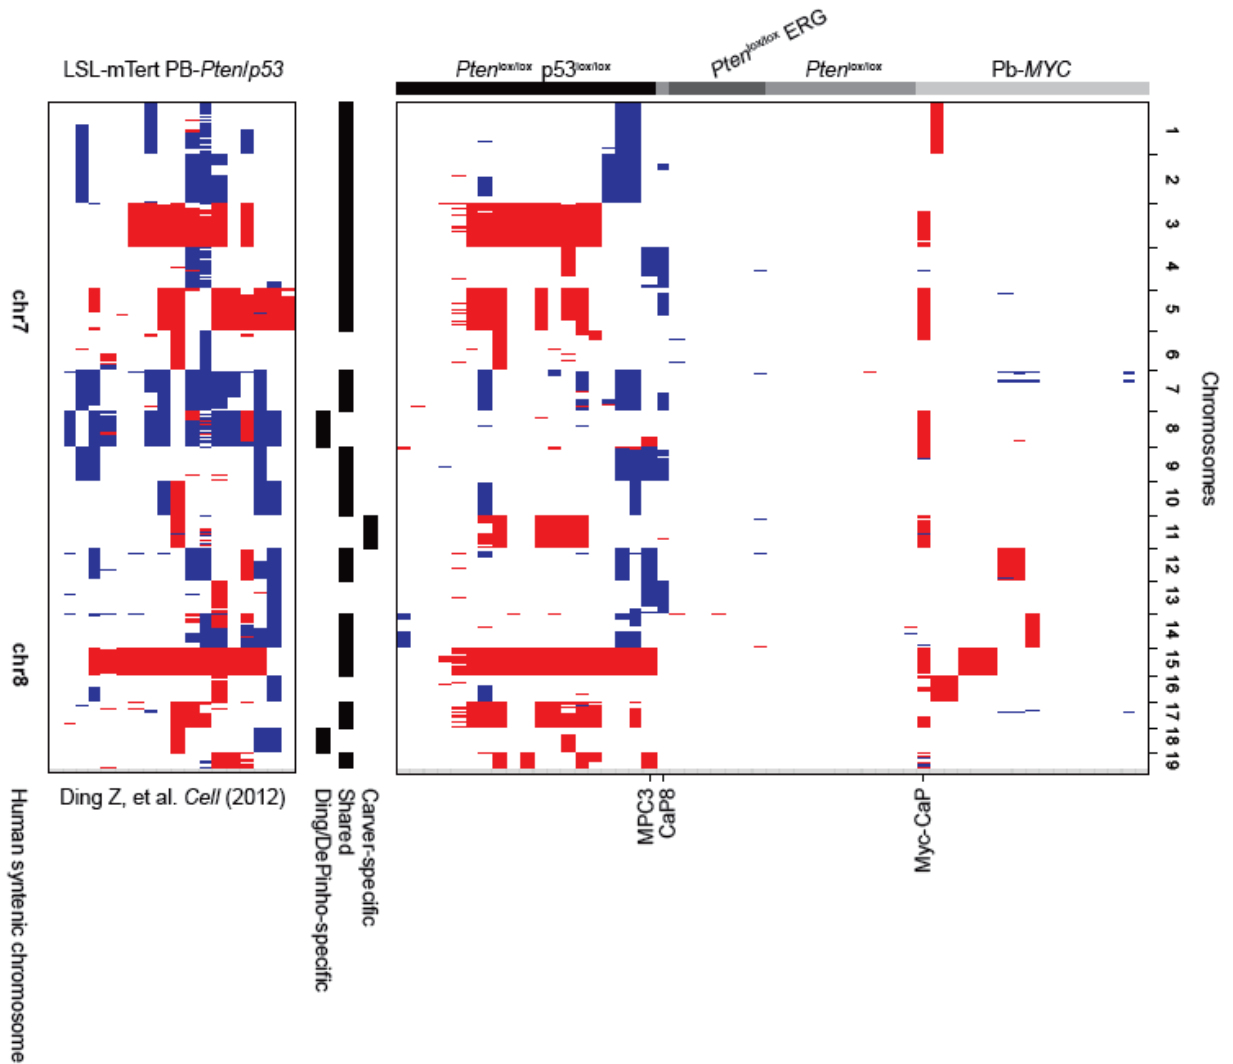

**Figure S2. Genomic profiles of GEM models of prostate cancer.** Comparison of aCGH data of GEM models of prostate cancer including a recently published data set from Ding et al, 2012 where prostates from mTert Pten p53 null mice were analyzed. Blue color = copy number loss, Red color = copy number gain.

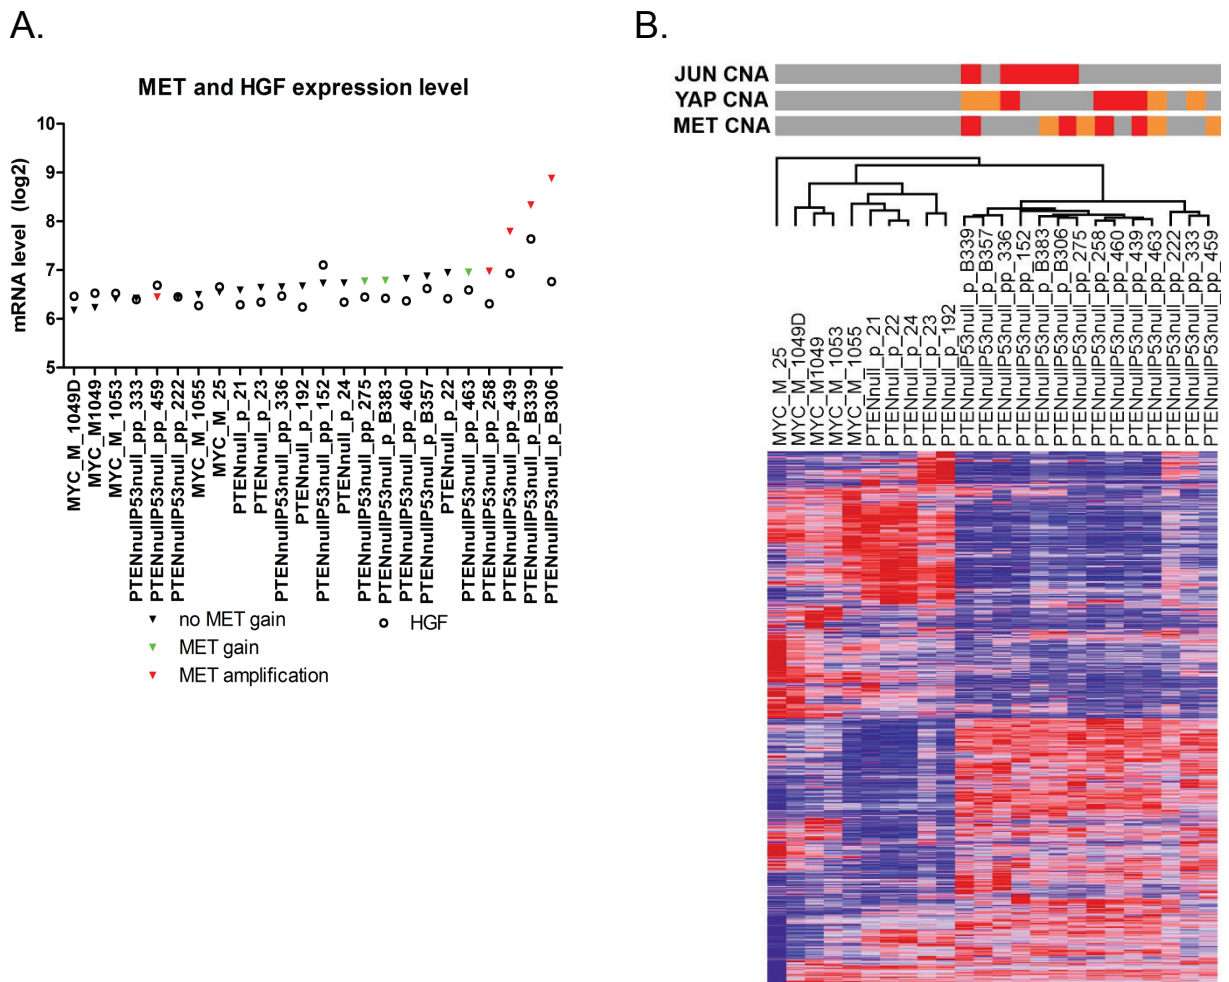

**Figure S3. MET and HGF expression in GEM models of prostate cancer.**

(A) mRNA expression of *Met* and *Hgf* in GEM models of prostate cancer, assayed by expression array and annotated by *Met* copy number status.

(B) Unsupervised hierarchical clustering of gene expression changes in 5 PB-*MYC*, 5 *Pten*<sup>lox/lox</sup> and 14 *Pten*<sup>lox/lox</sup> *p53*<sup>lox/lox</sup> mice, annotated with *Yap1*, *Met*, and *Jun* copy number gain status. Red indicates copy number amplification, orange indicates copy number gain, and gray indicates no copy number gain.

A.

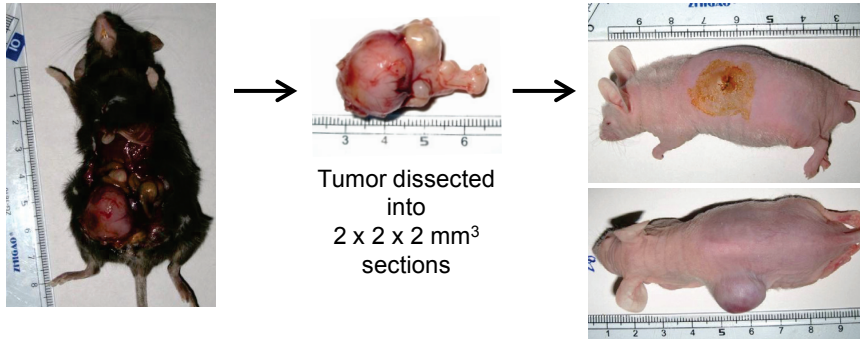

B.

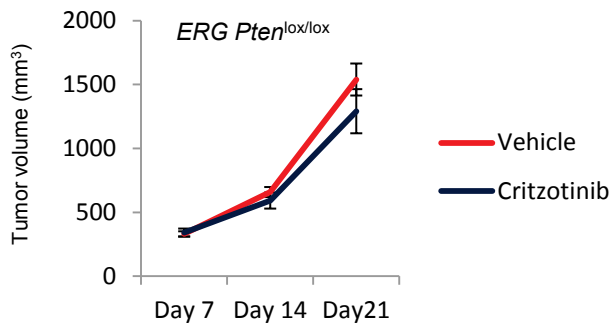

**Figure S4. Preclinical models of prostate cancer for therapeutic studies.**

(A) Prostate cancer specimens were harvested from *Pten* p53 null mice, dissected, and transplanted into athymic mice to establish tumors. (B) Mice grafter with tumors derived from *Pten ERG* mice (no *Met* copy number gain) were treated with vehicle (n=8) or crizotinib (n=8, 50 mg/kg/day, Pfizer) for a total of 21 days and tumor volumes were measured on a weekly basis.
